# Supplementary material for: Two Negative-Strand RNA Viruses Identified in Watermelon Represent a Novel Clade in the Order Bunyavirales
Source: PubMed Central journal article supplement (PMC5552725; doi:10.3389/fmicb.2017.01514), 2017-08-09
Supplement: Presentation1.pdf [file Presentation1.pdf]

*Supplementary Materials*

**Two negative-strand RNA viruses identified in watermelon  
represent a novel clade in the order *Bunyavirales***

**Min Xin, Mengji Cao<sup>\*</sup>, Wenwen Liu, Yingdang Ren, Xueping Zhou, Xifeng Wang<sup>\*</sup>**

**\* Correspondence:** Corresponding Author: [xfwang@ippcaas.cn](mailto:xfwang@ippcaas.cn); [caomengji@cric.cn](mailto:caomengji@cric.cn)

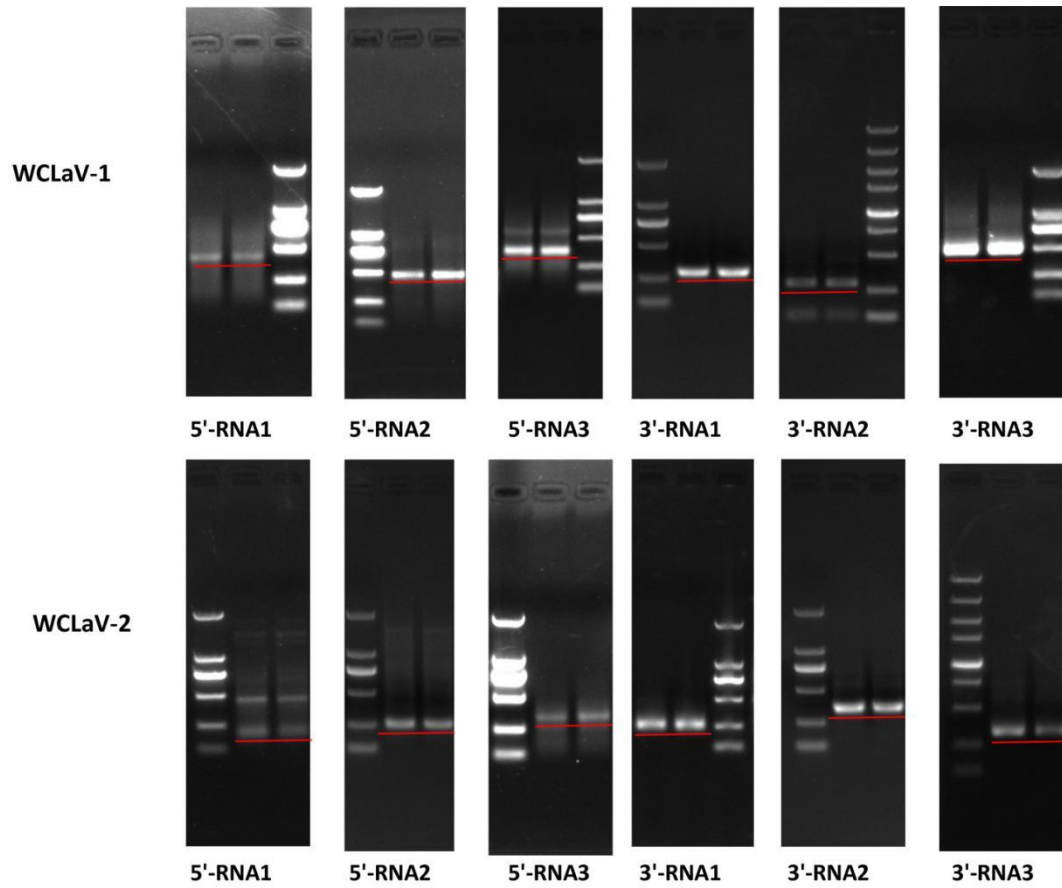

FIGURE S1 | Agarose gel electrophoresis of products from 5' RACE and 3' RACE of RNAs 1–3 in 1.0 % agarose gel. Target bands are marked with red lines.

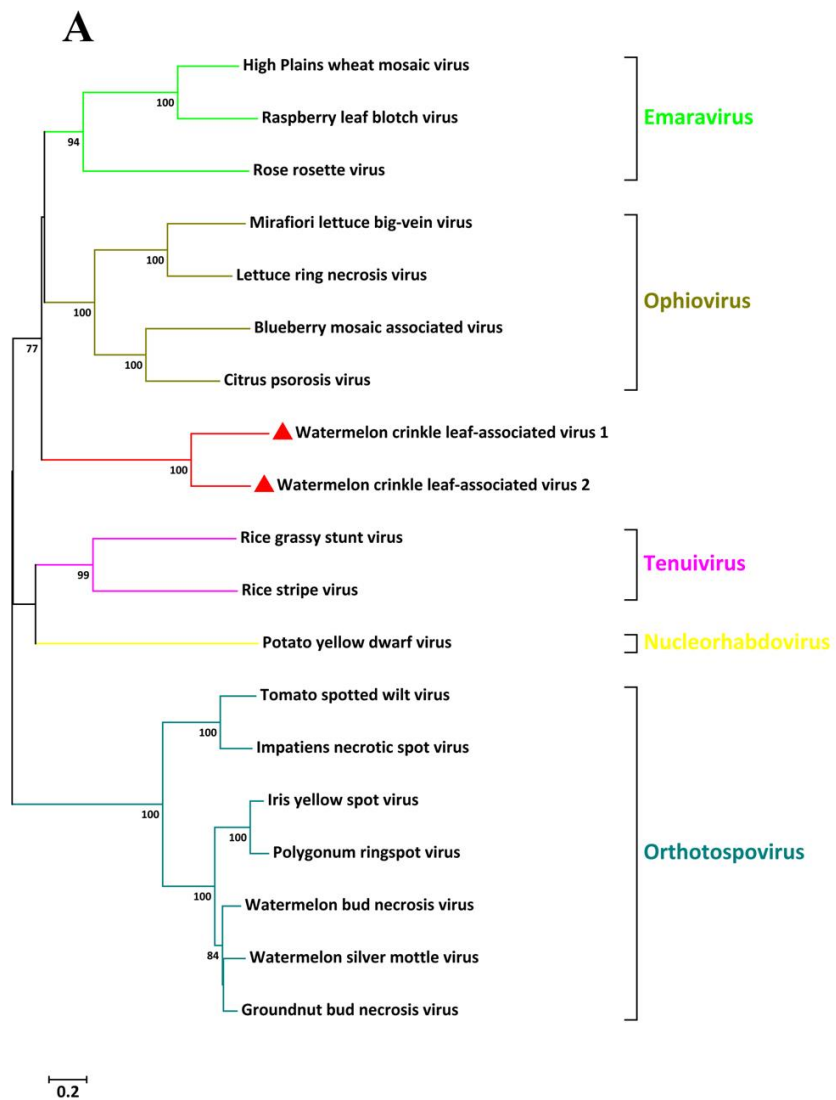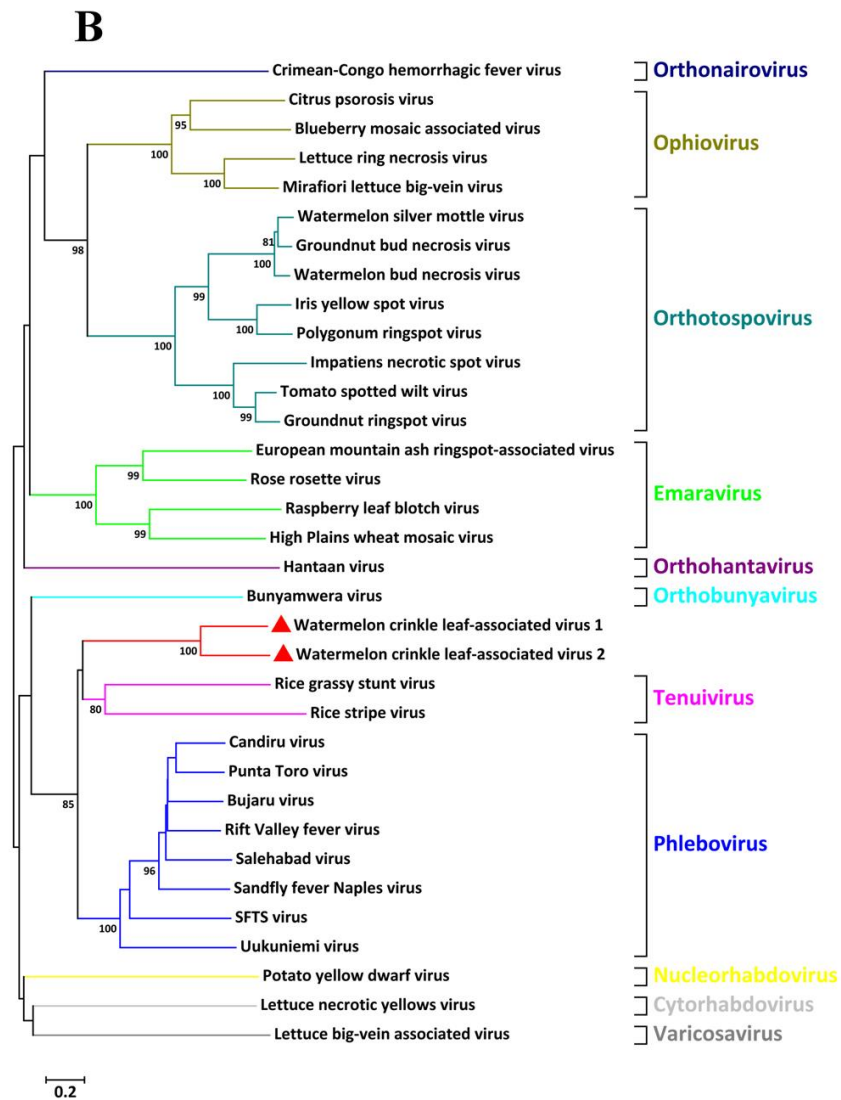

FIGURE S2 | Phylogenetic analysis of WCLaV-1, WCLaV-2 based on the amino acid sequences of putative MP (A) and NP (B) with the corresponding proteins of representative negative-sense RNA viruses. The GenBank accession numbers are shown in Table S5.

**TABLE S1 | Contigs obtained by *de novo* assembly of sRNAs from symptomatic watermelon samples and sharing identities with ophioviruses and phleboviruses.**

|                | <b>Contig</b> | <b>Length (nt)</b> | <b>BlastX results</b>                                                   | <b>E-value</b> | <b>Identities</b> | <b>Accession No.</b> |
|----------------|---------------|--------------------|-------------------------------------------------------------------------|----------------|-------------------|----------------------|
| <b>WCLaV-1</b> | contig 21     | 3886               | RNA-dependent RNA polymerase [severe fever with thrombocytopenia virus] | 1e-71          | 220/768 (29%)     | AMK05809.1           |
|                | contig 94     | 2725               | RNA-dependent RNA polymerase [Wuhan insect virus 16]                    | 7e-41          | 234/889 (26%)     | APG79216.1           |
|                | contig 223    | 1018               | 54 kDa protein [Citrus psorosis virus]                                  | 1.3            | 28/116 (24%)      | AEU04873.1           |
|                | contig 86     | 906                | nucleopasid protein [Bole Tick Virus 1]                                 | 2e-14          | 56/175 (32%)      | AJG39301.1           |
| <b>WCLaV-2</b> | contig_162    | 6660               | RNA-dependent RNA polymerase [Huangpi Tick Virus 2]                     | 5e-113         | 419/1688 (25%)    | YP_009293590.1       |
|                | contig_961    | 1513               | 58kDa Movement protein [Blueberry mosaic associated virus]              | 1.8            | 25/133 (19%)      | AJR35805.1           |
|                | contig_268    | 1267               | nucleopasid protein [Bole Tick Virus 1]                                 | 6e-09          | 56/195 (29%)      | AJG39301.1           |
|                |               |                    |                                                                         |                |                   |                      |

**TABLE S2 | Features of proteins encoded in the negative-sense orientation by WCLaV-1 and WCLaV-2 genome.**

| Virus   | Gene name | Open reading frames (ORF) position | Calculated Mr (kDa) | Isoelectric point (pI) | Blastp match in NCBI                                                                                   | E-value | Query coverage (%) | Identities     | Predicted domains (SMART) | Amino acid position of predicted domain |
|---------|-----------|------------------------------------|---------------------|------------------------|--------------------------------------------------------------------------------------------------------|---------|--------------------|----------------|---------------------------|-----------------------------------------|
| WCLaV-1 | RNA1      | 38-6586                            | 252.76              | 6.64                   | RNA-dependent RNA polymerase of Guertu virus, genus <i>Phlebovirus</i> , ID: APG79349.1                | 4e-108  | 61                 | 361/1430 (25%) | Bunya_RdRp (5.7e-51)      | 556-1240                                |
|         | RNA2      | 198-1358                           | 44.29               | 6.39                   | 54 kDa protein of Citrus psorosis virus, genus <i>Ophiovirus</i> , ID: AEU04874.1                      | 1.4     | 29                 | 28/116 (24%)   | No significant            | —                                       |
|         | RNA3      | 208-1251                           | 38.75               | 8.64                   | nucleocapsid of sandfly fever Naples virus, Genus <i>Phlebovirus</i> , ID: ABQ23550.1                  | 7e-11   | 65                 | 58/232 (25%)   | Tenui_N (5.4e-16)         | 92-309                                  |
| WCLaV-2 | RNA1      | 40-6636                            | 253.63              | 6.20                   | RNA-dependent RNA polymerase of Huangpi tick virus 2, genus <i>Phlebovirus</i> , ID: YP_009293590.1    | 6e-117  | 71                 | 421/1688 (25%) | Bunya_RdRp (1.1e-47)      | 553-1242                                |
|         | RNA2      | 157-1368                           | 46.11               | 7.55                   | 58 kDa Movement protein of blueberry mosaic associated virus, genus <i>Ophiovirus</i> , ID: AJR35805.1 | 1.8     | 29                 | 25/133 (19%)   | No significant            | —                                       |
|         | RNA3      | 158-1198                           | 38.68               | 8.83                   | Nucleocapsid of sandfly fever Naples virus, genus <i>Phlebovirus</i> , ID: ABQ23550.1                  | 2e-14   | 68                 | 68/246 (28%)   | Tenui_N (3.2e-17)         | 79-292                                  |

—: Not applicable.

**TABLE S3 | List of primer sequences used to amplify the genomes of WCLaV-1 and WCLaV-2.**

| Virus          | RNA                    | Primer name          | Primer sequences (5'-3') | F/R                    | Primer position    | Purpose                                                   |                                                           |
|----------------|------------------------|----------------------|--------------------------|------------------------|--------------------|-----------------------------------------------------------|-----------------------------------------------------------|
| WCLaV-1        | RNA1                   | RNA1-5'-GSP1         | CAGATACTTGAAAAT          | R                      | 319-334            | 5' primer for synthesis of 1 <sup>st</sup> -stranded cDNA |                                                           |
|                |                        | RNA1-5'-GSP2         | CTGCCAAACTCTTATAGGACAA   | R                      | 268-289            | 5'-RACE PCR                                               |                                                           |
|                |                        | RNA1-5'-GSP3         | TGGCTGGATACGAGACTTGTGG   | R                      | 63-84              | 5'-RACE Nested-PCR                                        |                                                           |
|                |                        | RNA1-3'-GSP2         | GGCATCGGATTGAAATAACAT    | F                      | 6350-6370          | 3'-RACE PCR                                               |                                                           |
|                |                        | RNA1-3'-GSP3         | CAGTAGATAAGAAAAGAGTTGG   | F                      | 6505-6526          | 3'-RACE Nested-PCR                                        |                                                           |
|                |                        | RdRp-Z- F            | GGACTACCACTGAAGCAAAC     | F                      | 3709-3728          | the gap between RNA1                                      |                                                           |
|                | RdRp-Z-R               | CATCCTGTAGAATTATTGCC | R                        | 4038-4057              |                    |                                                           |                                                           |
|                | RNA2                   | RNA2-5'-1-GSP1       | TACCCCGTCTGTGCT          | R                      | 580-595            | 5' primer for synthesis of 1 <sup>st</sup> -stranded cDNA |                                                           |
|                |                        | RNA2-5'-1-GSP2       | GCTCAAAGACGGAAGTAAGA     | R                      | 510-530            | 5'-RACE PCR                                               |                                                           |
|                |                        | RNA2-5'-1-GSP3       | GGAACAGACAAAGCCAATCACAT  | R                      | 440-462            | 5'-RACE Nested-PCR                                        |                                                           |
|                |                        | RNA2-5'-2-GSP1       | CAAAGACGGAAAGTAAGAAAC    | R                      | 507-527            | 5' primer for synthesis of 1 <sup>st</sup> -stranded cDNA |                                                           |
|                |                        | RNA2-5'-2-GSP2       | GGAACAGACAAAGCCAATCAC    | R                      | 442-462            | 5'-RACE PCR                                               |                                                           |
|                |                        | RNA2-5'-2-GSP3       | ATTGAAGAGGAGATTACCAG     | R                      | 259-278            | 5'-RACE Nested-PCR                                        |                                                           |
|                |                        | RNA2-3'-GSP2         | AACCCTTGCTCGTTTTCCGG     | F                      | 1162-1180          | 3'-RACE PCR                                               |                                                           |
|                |                        | RNA2-3'-GSP3         | TCCCTTCGTTGGCTGCTGG      | F                      | 1298-1317          | 3'-RACE Nested-PCR                                        |                                                           |
|                |                        | RNA3                 | RNA3-5'-1-GSP1           | CCCTGGAATAGTGATAC      | R                  | 630-646                                                   | 5' primer for synthesis of 1 <sup>st</sup> -stranded cDNA |
|                |                        |                      | RNA3-5'-1-GSP2           | GTCTCAAACACTCCCTGCTG   | R                  | 558-577                                                   | 5'-RACE PCR                                               |
|                |                        |                      | RNA3-5'-1-GSP3           | CCCTCCAGAGTCTATTCGTGTC | R                  | 337-358                                                   | 5'-RACE Nested-PCR                                        |
|                |                        |                      | RNA3-5'-2-GSP1           | GATGTTGAGGGTCTGTT      | R                  | 404-420                                                   | 5' primer for synthesis of 1 <sup>st</sup> -stranded cDNA |
|                |                        |                      | RNA3-5'-2-GSP2           | TCCAGAGTCTATTCGTGTCAAA | R                  | 334-355                                                   | 5'-RACE PCR                                               |
| RNA3-5'-2-GSP3 |                        |                      | CAGAAAACAAGAAAAGGCACAA   | R                      | 96-117             | 5'-RACE Nested-PCR                                        |                                                           |
| RNA3-3'-GSP2   | CAACAGCAGAGGGAGTCATAGC |                      | F                        | 1083-1104              | 3'-RACE PCR        |                                                           |                                                           |
| RNA3-3'-GSP3   | CAATAAGTTCTGCGTTAGTGTG |                      | F                        | 1224-1245              | 3'-RACE Nested-PCR |                                                           |                                                           |
| WCLaV-2        | RNA1                   | RNA1-5'-GSP1         | GTATCACCCAGAAATG         | R                      | 495-510            | 5' primer for synthesis of 1 <sup>st</sup> -stranded cDNA |                                                           |

|                           |                          |                                              |        |           |                                                                                                                                                                                                                                        |
|---------------------------|--------------------------|----------------------------------------------|--------|-----------|----------------------------------------------------------------------------------------------------------------------------------------------------------------------------------------------------------------------------------------|
|                           | RNA1-5'-GSP2             | GAGCATTCAACTTACAGGGA                         | R      | 194-213   | 5'-RACE PCR                                                                                                                                                                                                                            |
|                           | RNA1-5'-GSP3             | TTCAAGGCTACGAGACAGGAGG                       | R      | 98-119    | 5'-RACE Nested-PCR                                                                                                                                                                                                                     |
|                           | RNA1-3'-GSP2             | CAGCCTTGTCTTCATAACTAATA                      | F      | 6324-6346 | 3'-RACE PCR                                                                                                                                                                                                                            |
|                           | RNA1-3'-GSP3             | TGGCTCTGGAAAATCTGAACAC                       | F      | 6541-6562 | 3'-RACE Nested-PCR                                                                                                                                                                                                                     |
|                           | RNA2-5'-GSP1             | ACTCTGTTGACCCTGA                             | R      | 326-341   | 5' primer for synthesis of 1 <sup>st</sup> -stranded cDNA                                                                                                                                                                              |
|                           | RNA2-5'-GSP2             | AGATGAAGAAGTGGATGTTGAGG                      | R      | 219-241   | 5'-RACE PCR                                                                                                                                                                                                                            |
| RNA2                      | RNA2-5'-GSP3             | GGAAGAAAGGCTGATGAAGGG                        | R      | 185-205   | 5'-RACE Nested-PCR                                                                                                                                                                                                                     |
|                           | RNA2-3'-GSP2             | GGCAACATACTGAAACCTCTT                        | F      | 1126-1146 | 3'-RACE PCR                                                                                                                                                                                                                            |
|                           | RNA2-3'-GSP3             | CATCTCTTGCCACCTGCTCATT                       | F      | 1239-1260 | 3'-RACE Nested-PCR                                                                                                                                                                                                                     |
|                           | RNA3-5'-GSP1             | TTACCTCCAGTGATGC                             | R      | 505-520   | 5' primer for synthesis of 1 <sup>st</sup> -stranded cDNA                                                                                                                                                                              |
|                           | RNA3-5'-GSP2             | TGCGTCATCAGCCTTTGCT                          | R      | 488-507   | 5'-RACE PCR                                                                                                                                                                                                                            |
| RNA3                      | RNA3-5'-GSP3             | TTGATGATTTGCTTGTACTGC                        | R      | 240-261   | 5'-RACE Nested-PCR                                                                                                                                                                                                                     |
|                           | RNA3-3'-GSP2             | CTGCTATCCTTGCCTCTGTTATC                      | F      | 940-962   | 3'-RACE PCR                                                                                                                                                                                                                            |
|                           | RNA3-3'-GSP3             | GCCGATTGTTCACTTTCAGG                         | F      | 1116-1135 | 3'-RACE Nested-PCR                                                                                                                                                                                                                     |
|                           | AAP                      | GGCCACGCGTCGACTAGTACGGGI<br>IGGGIIGGGIIG     | F      |           | 5' Abridged Anchor Primer, supplied with 5' RACE System for Rapid Amplification of cDNA Ends Kit                                                                                                                                       |
| WCLaV-1<br>and<br>WCLaV-2 | RNA1-3<br>AUAP1<br>AUAP2 | GGCCACGCGTCGACTAGTAC<br>GGCCACGCGTCGACTAGTAC | F<br>R |           | 5' Abridged Universal Amplification Primer, supplied with 5' RACE System for Rapid Amplification of cDNA Ends Kit<br>3' Abridged Universal Amplification Primer, supplied with 3' RACE System for Rapid Amplification of cDNA Ends Kit |
|                           | AP                       | GGCCACGCGTCGACTAGTACTTTT<br>TTTTTTTTTTTTT    | R      |           | 3' Adapter Primer for synthesis of 1st-stranded cDNA, supplied with 3' RACE System for Rapid Amplification of cDNA Ends Kit                                                                                                            |

F/R: forward primer/reverse primer.



**TABLE S4 | List of primer sequences used to detect WCLaV-1 and WCLaV-2 by RT-PCR.**

| <b>Primer name</b> | <b>Sequences (5'-3')</b> | <b>F/R</b> | <b>Product size (bp)</b> |
|--------------------|--------------------------|------------|--------------------------|
| MP-1F              | TCCCTTGAACTCTTTCCAC      | F          | 1005                     |
| MP-1R              | TAACTAGCCGCTTTTCATAAG    | R          |                          |
| NP-1F              | ACCCTCAACATCTGGTTTCT     | F          | 902                      |
| NP-1R              | AAAACACAAAGATCCCATTA     | R          |                          |
| MP-2F              | TAGACTTCAGAACCTCAACATCC  | F          | 644                      |
| MP-2R              | AACAGACCAATCGGTGCAAG     | R          |                          |
| NP-2F              | CTAAATTCCCAGTGAGAGCAAC   | F          | 778                      |
| NP-2R              | GCAGTTGAGAGCTTGCCCAC     | R          |                          |

F/R: forward primer/reverse primer.

**TABLE S5 | List of abbreviations and accession numbers for viruses used in this study.**

| Virus                                           | Virus<br>abbreviation | Accession number |          |            |           |           |              |
|-------------------------------------------------|-----------------------|------------------|----------|------------|-----------|-----------|--------------|
|                                                 |                       | RNA1             | RNA2     | RNA3       | RdRp      | MP        | NP           |
| European mountain ash ringspot-associated virus | EMARaV                | AY563040         | DQ831828 | DQ831831   | AAS73287  | ABH05069  | ABH05070     |
| Rose rosette virus                              | RRV                   | HQ871942         | HQ871945 | HQ871944   | ADZ54688  | ADZ54691  | ADZ54690     |
| Raspberry leaf blotch virus                     | RLBV                  | FR823299         | FR823302 | FR823301   | CBZ42024  | CBZ42027  | CBZ42026     |
| High Plains wheat mosaic virus                  | HPWMoW                | KJ939623         | KJ939627 | KJ939626   | AIK23031  | AIK23035  | AIK23034     |
| Rice stripe virus                               | RSV                   | D31879           | D10979   | X53563     | NP_620522 | NP_620519 | NP_620548    |
| Rice grassy stunt virus                         | RGSV                  | AB009656         | AB010378 | AB010377   | BAA32246  | BAA22534  | BAA22532     |
| Rift Valley fever virus                         | RVFV                  | DQ375403.1       | —        | DQ380151.1 | ABD51507  | —         | ABD38733     |
| SFTS virus                                      | SFTSV                 | HM745930         | —        | HM745932   | ADZ04470  | —         | ADZ04472     |
| Uukuniemi virus                                 | UUKV                  | D10759           | —        | M33551     | BAA01590  | —         | AAA47958     |
| Sandfly fever Naples virus                      | SFNV                  | X68414           | —        | X53794     | CAA48478  | —         | CAA37803     |
| Punta Toro virus                                | PuTV                  | KP272028         | —        | KP272030   | AKF42419  | —         | YP_009142918 |
| Salehabad virus                                 | SALV                  | KJ939330         | —        | KJ939332   | AJK91618  | —         | AJK91621     |
| Candiru virus                                   | CDUV                  | HM119407         | —        | HM119409   | AEA30057  | —         | AEA30071     |
| Bujaru virus                                    | BUJV                  | HM566164         | —        | HM566166   | AEL29657  | —         | AEL29659     |
| Tomato spotted wilt virus                       | TSWV                  | D10066           | S48091   | D00645     | NP_049362 | YP_009225 | NP_049361    |
| Watermelon bud necrosis virus                   | WBNV                  | GU735408         | GU584185 | GU584184   | ADW23570  | ADD83167  | ADD83166     |
| Watermelon silver mottle virus                  | WSMoV                 | AF133128         | U75379   | U78734     | AAG43276  | AAB41722  | AAB36956     |
| Impatiens necrotic spot virus                   | INSV                  | X93218           | M74904   | X66972     | —         | AAA46241  | CAA47383     |
| Groundnut bud necrosis virus                    | GBNV                  | AF025538         | U42555   | U27809     | AAB94085  | AAC55520  | AAB04145     |
| Groundnut ringspot virus                        | GRSV                  | KT972590         | —        | KT972594   | AMZ00269  | —         | AMZ00273     |
| Iris yellow spot virus                          | IYSV                  | FJ623474         | AF214014 | AF001387   | ACM89280  | AAL62022  | AAB61923     |
| Polygonum ringspot virus                        | PolRSV                | KJ541746         | KJ541745 | KJ541744   | AHZ45965  | AHZ45963  | AHZ45961     |

|                                       |       |             |             |             |           |           |           |
|---------------------------------------|-------|-------------|-------------|-------------|-----------|-----------|-----------|
| Hantaan virus                         | HTAV  | X55901      | —           | M14626      | CAA39394  | —         | AAA43837  |
| Bunyamwera virus                      | BUNV  | X14383      | —           | D00353      | CAA32553  | —         | BAA00261  |
| Crimean-Congo hemorrhagic fever virus | CCHFV | U88410      | —           | AY389508    | AAQ90157  | —         | AAB48501  |
| Citrus psorosis virus                 | CPsV  | NC_006314.1 | NC_006315.1 | NC_006316.1 | YP_089661 | YP_089663 | YP_089664 |
| Lettuce ring necrosis virus           | LRNV  | NC_006051   | NC_006052   | NC_006053   | YP_053236 | YP_053238 | YP_053239 |
| Blueberry mosaic associated virus     | BIMaV | KJ704366    | KJ704367    | KJ704368    | AIF28241  | AIF28243  | AIF28244  |
| Mirafiori lettuce big-vein virus      | MLBVV | AF525933    | AF525934    | AF525935    | AAN60447  | AAN60448  | AAN60449  |
| Lettuce big-vein associated virus     | LBVaV | AB075039.1  | —           | AB114138.1  | BAC16226  | —         | BAD36830  |
| Lettuce necrotic yellows virus        | LNyV  | AJ867584.2  | —           | AJ867584.2  | CAI30426  | —         | CAI30421  |
| Potato yellow dwarf virus             | PYDV  | GU734660.1  | GU734660.1  | GU734660.1  | ADE45274  | ADE45271  | ADE45268  |

—: Not applicable.
